# Supplementary material
Source: PubMed Central journal article supplement (PMC1783133)

**Block M: Locality SC-62 (Layer 1)**

Phalanges of *Acidomomys hebeticus*

| Number | Element            | Length (mm) |
|--------|--------------------|-------------|
| 1      | R. Intermediate    | 4.82        |
| 2      | R. Intermediate    | ~6.12       |
| 3      | R. Intermediate    | ~4.8        |
| 4      | R. Scaphoid        | *           |
| 5      | R. Proximal        | (est) 6.3   |
| 6      | R. Proximal        | (est) 6.75  |
| 7      | R. Proximal        | 5.9         |
| 8      | R. (?pollical)     | 5.5         |
| 9      | (?R.) Proximal     | (est) 6.3   |
| 10     | R. Astragalus      | *           |
| 11     | (?L.) Intermediate | 5.5         |
| 12     | (?L.) Proximal     | (est) 6.27  |
| 13     | (?L.) Intermediate | 5.3         |
| 14     | L. Scaphoid        | *           |

**Epiphyseal lengths:**

proximal ~0.51-0.68mm  
intermediate ~0.40-0.51mm

**Key:**

~ badly damaged  
(est) estimate [assuming constant proportions]  
\* proximodistal length not relevant here

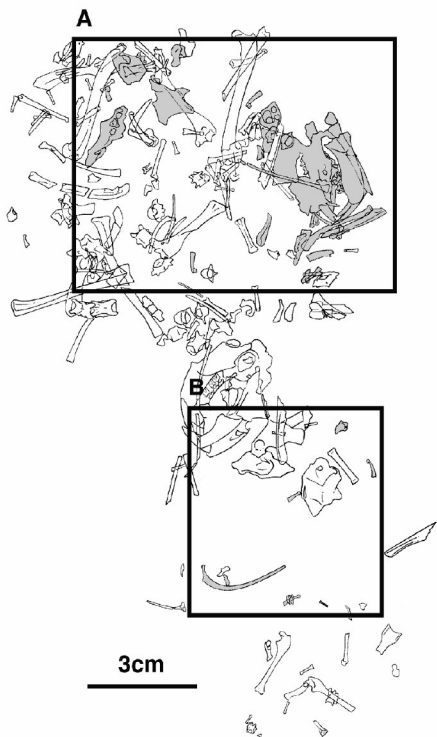

**Block M: Locality SC-62 (Layer 2)**

Phalanges of *Acidomomys hebeticus*

| Number   | Element      | Length    |
|----------|--------------|-----------|
| 15       | Proximal     | 6.69      |
| 16       | Intermediate | 6.51      |
| 17       | Proximal     | (est) 7.3 |
| 18       | Intermediate | ~6.3      |
| 19       | R. (?pollux) | 5.21      |
| 20       | Intermediate | 6.48      |
| *with 20 | Proximal     | 6.84      |
| 21       | Intermediate | 6.5       |
| 22       | Proximal     | 6.77      |

**Epiphyseal lengths:**

proximal ~0.51-0.68mm  
intermediate ~0.40-0.51mm

**Key:**

~ badly damaged  
(est) estimate [assuming constant proportions]  
\* association documented but not drawn

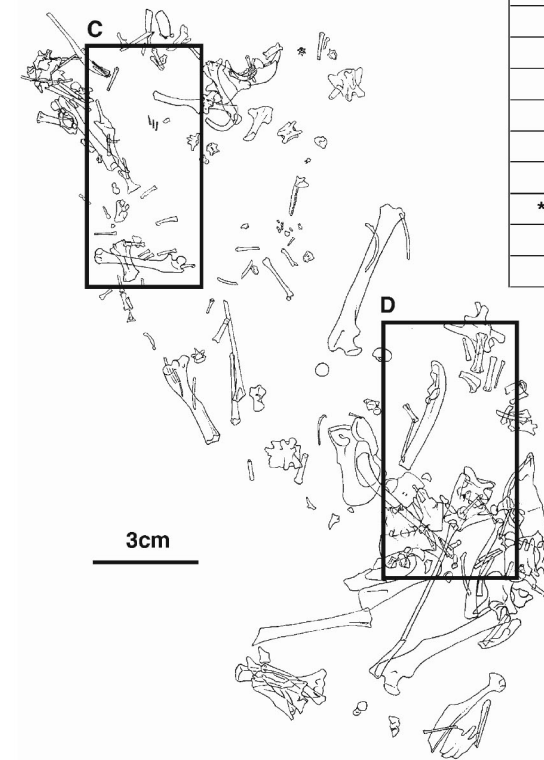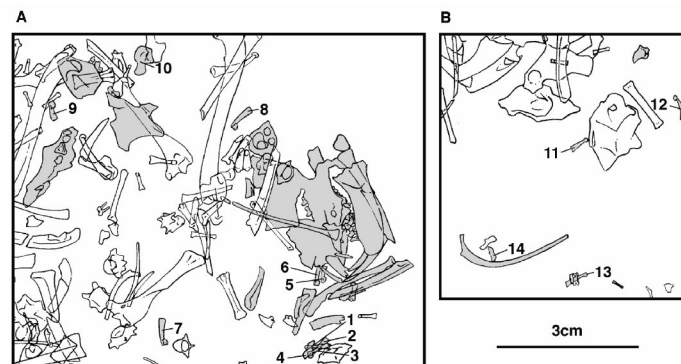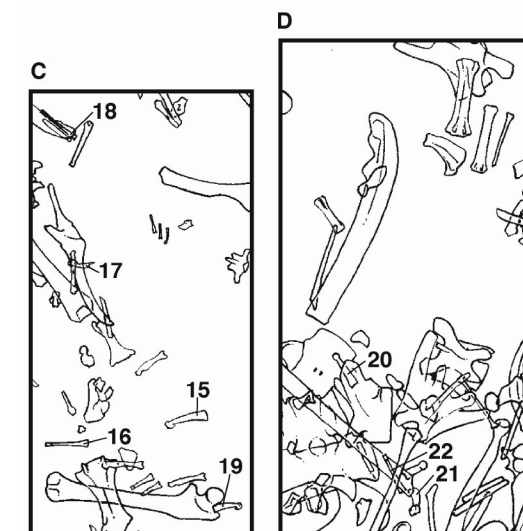

Supplement: pnas_0610579104_7.pdf [file pnas_0610579104_7.pdf]
