# Supplementary material
Source: PubMed Central journal article supplement (PMC1783133)

*Asioryctes*

Scandentia

Dermoptera

*Purgatorius*

Micromomyidae

Microsypidae

Paromomyoidea

*Pandemonium*

*Chronolestes*

Saxonellidae

Carpolestidae

Plesiadapidae

Euprimates

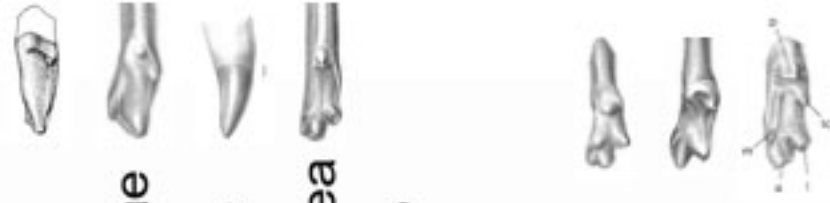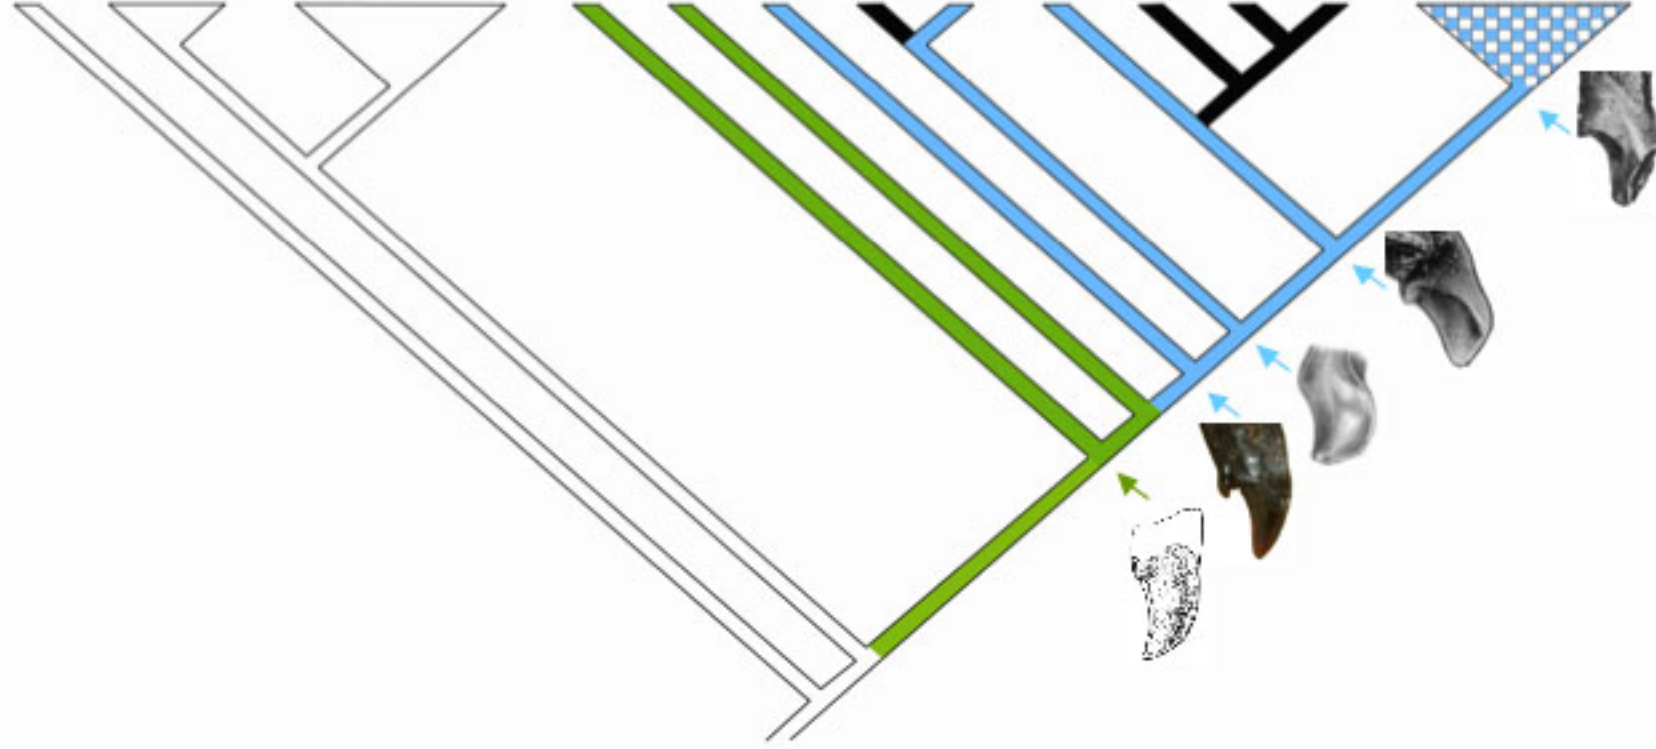

Supplement: pnas_0610579104_35.pdf [file pnas_0610579104_35.pdf]
