# Supplementary material
Source: PubMed Central journal article supplement (PMC1783133)
Supplement: pnas_0610579104_38.pdf [file pnas_0610579104_38.pdf]

**Table 1. Summary of mandibular dental measurements of *Ignacius clarkforkensis* from Cf-2 UM localities SC-62, 120, 127, 220, 188, 74, 117, and Cf-3 UM locality SC-214 ( $n=8$ ).**

| Tooth position | $n$ | Range     | $\bar{x}$ | $s$  | $V$   |
|----------------|-----|-----------|-----------|------|-------|
| p4L            | 4   | 1.99-2.31 | 2.17      | 0.16 | 7.25  |
| p4B            | 4   | 1.49-1.89 | 1.66      | 0.20 | 12.28 |
| p4H            | 4   | 2.37-2.48 | 2.44      | 0.05 | 2.04  |
| m1L            | 7   | 2.39-2.84 | 2.58      | 0.17 | 6.59  |
| m1B            | 7   | 2.03-2.49 | 2.22      | 0.15 | 6.94  |
| m2L            | 2   | 2.45-2.69 | 2.57      | 0.17 | 6.75  |
| m2B            | 2   | 2.18-2.22 | 2.20      | 0.03 | 1.29  |
| m3L            | 1   | 3.43      | -         | -    | -     |
| m3B            | 1   | 2.04      | -         | -    | -     |
| MD             | 5   | 7.06-8.53 | 7.39      | 0.64 | 8.65  |

Measurements are in millimeters.  $n$ , Sample size;  $\bar{x}$ , mean;  $s$ , standard deviation;  $V$ , coefficient of variation; L, crown length; B, crown breadth; H, crown height; and MD, mandibular depth.
