# Supplementary material
Source: PubMed Central journal article supplement (PMC1783133)

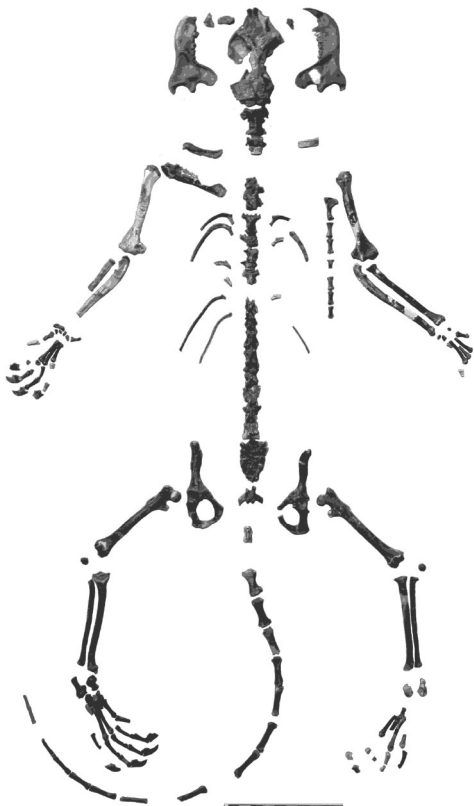

Supplement: pnas_0610579104_1.pdf [file pnas_0610579104_1.pdf]

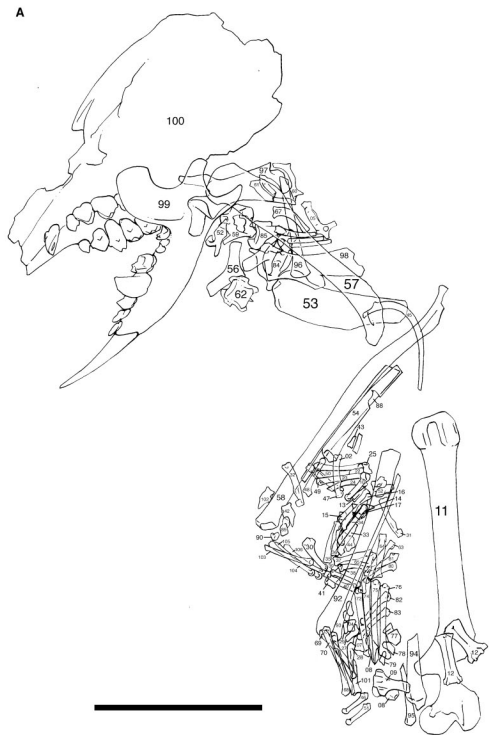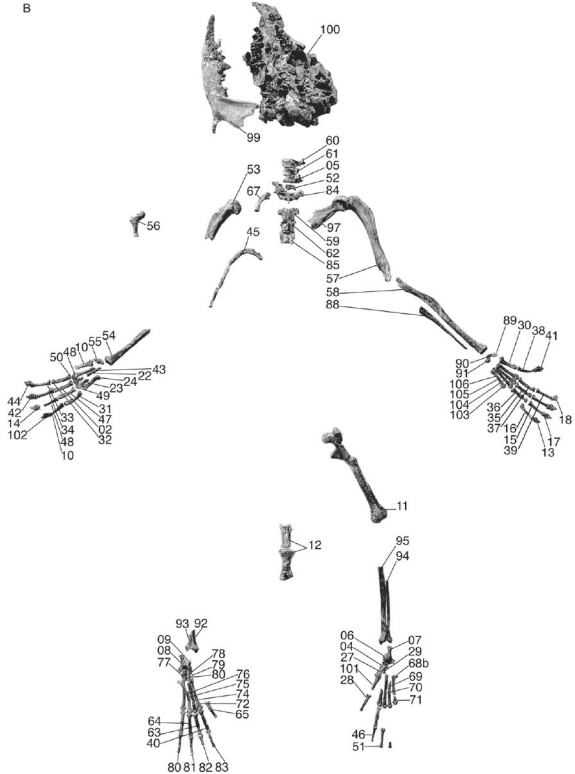

Supplement: pnas_0610579104_10.pdf [file pnas_0610579104_10.pdf]

**A**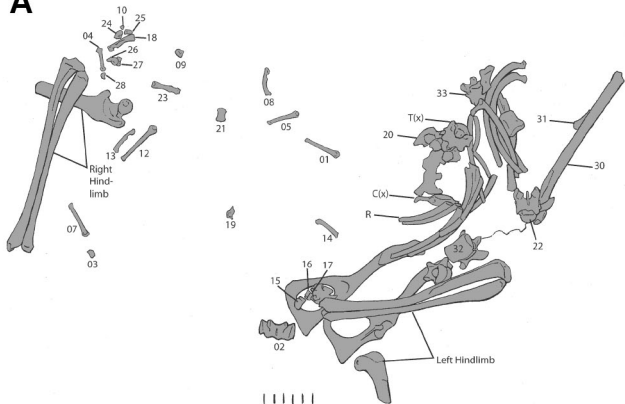**B**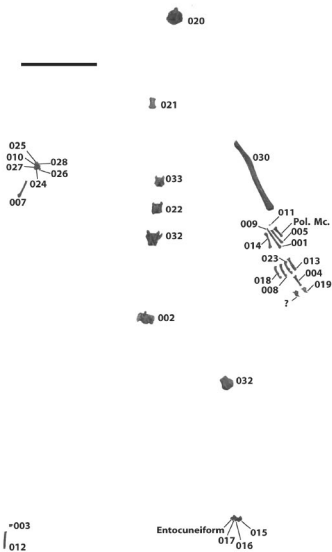

Supplement: pnas_0610579104_11.pdf [file pnas_0610579104_11.pdf]

**A**

In[intermediate phalanx length(mm)]

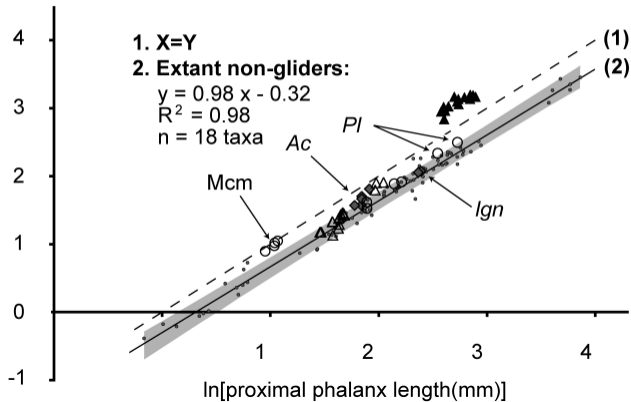**B**

log Interphalangeal ratio

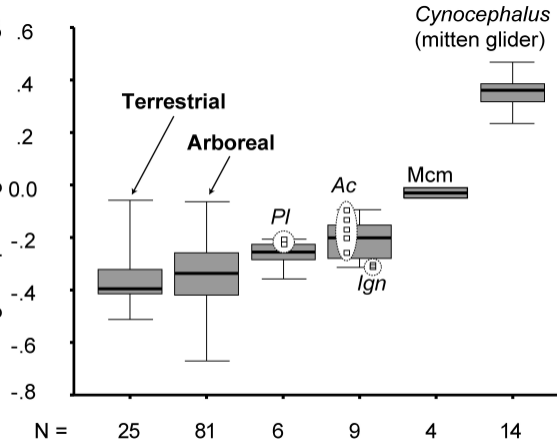

Supplement: pnas_0610579104_12.pdf [file pnas_0610579104_12.pdf]

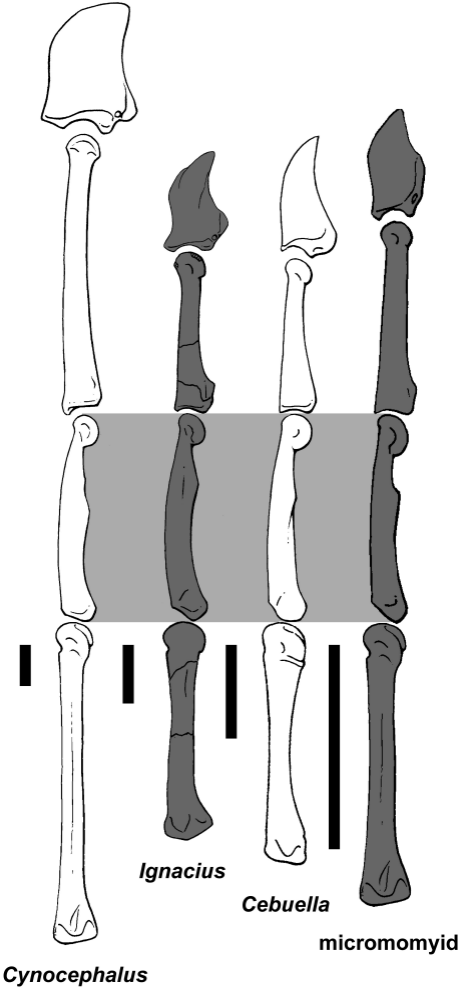

Supplement: pnas_0610579104_13.pdf [file pnas_0610579104_13.pdf]

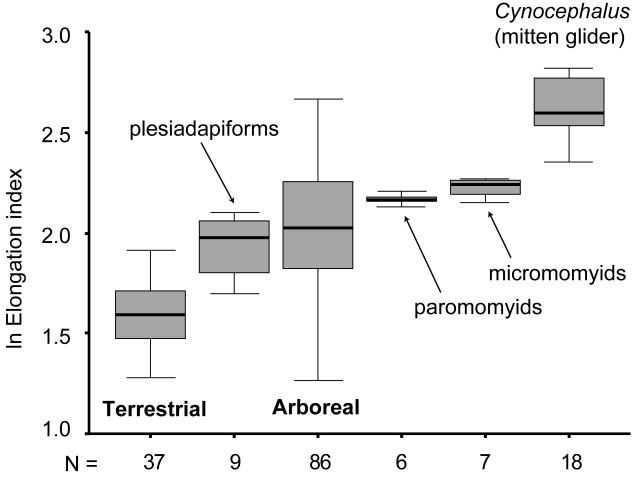

Supplement: pnas_0610579104_14.pdf [file pnas_0610579104_14.pdf]

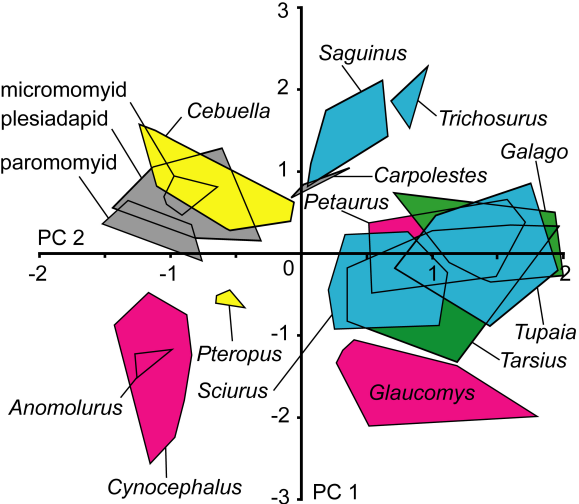

Supplement: pnas_0610579104_15.pdf [file pnas_0610579104_15.pdf]

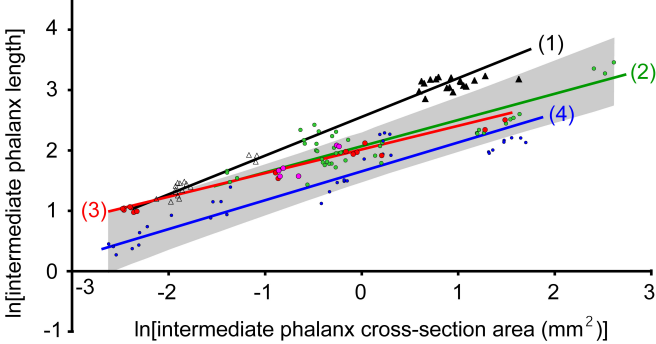

Supplement: pnas_0610579104_16.pdf [file pnas_0610579104_16.pdf]

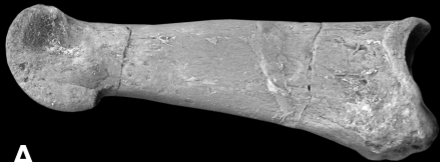

**A**

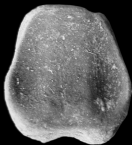

**B**

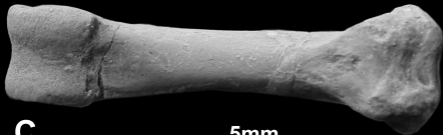

**C**

5mm

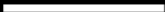

Supplement: pnas_0610579104_17.pdf [file pnas_0610579104_17.pdf]

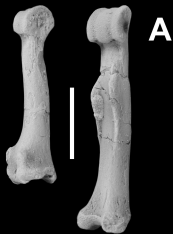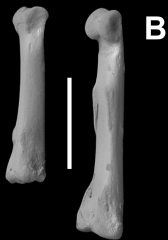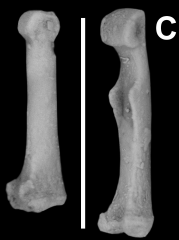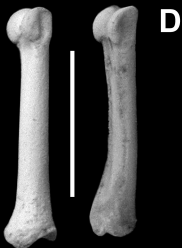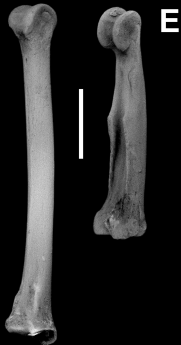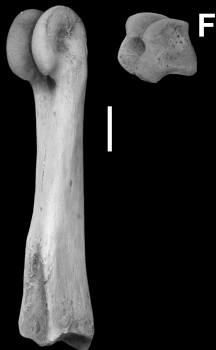

Supplement: pnas_0610579104_18.pdf [file pnas_0610579104_18.pdf]

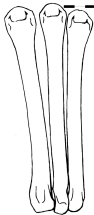

*Cynocephalus*

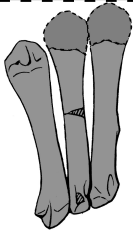

*Ignacius*

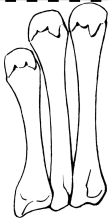

*Cebuella*

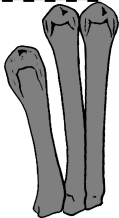

micromomyid

Supplement: pnas_0610579104_19.pdf [file pnas_0610579104_19.pdf]

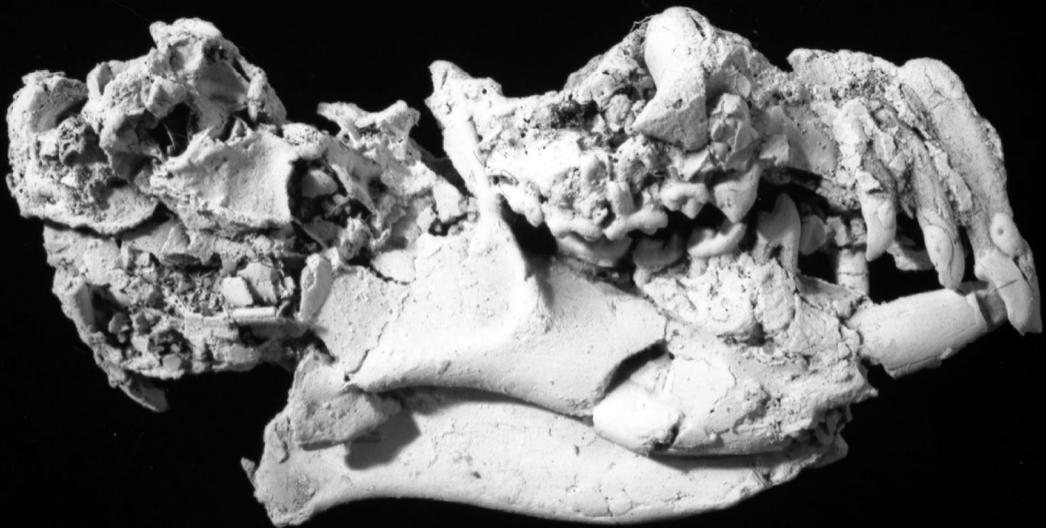

Supplement: pnas_0610579104_2.pdf [file pnas_0610579104_2.pdf]

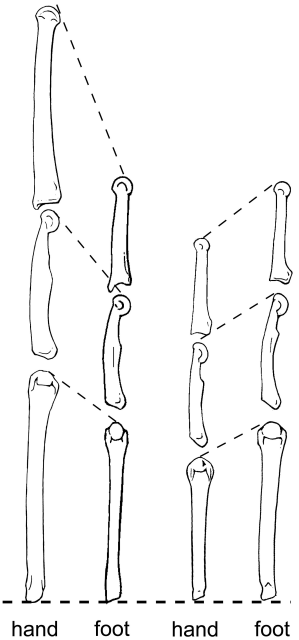

hand

foot

hand

foot

*Cynocephalus*

micromomyid

Supplement: pnas_0610579104_20.pdf [file pnas_0610579104_20.pdf]

**A**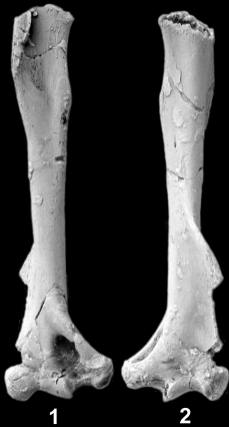**B**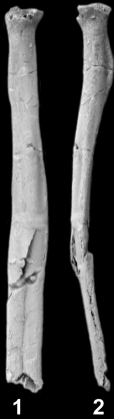**C**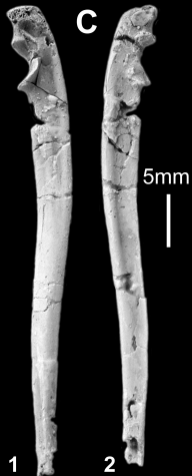

Supplement: pnas_0610579104_21.pdf [file pnas_0610579104_21.pdf]

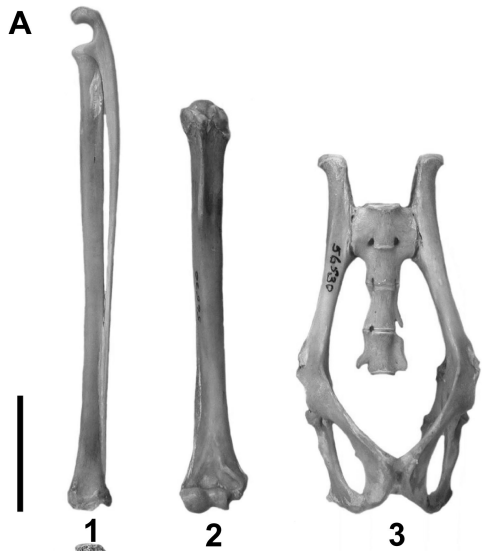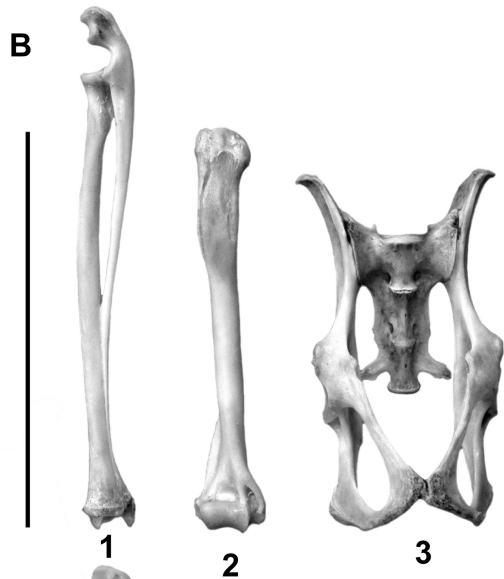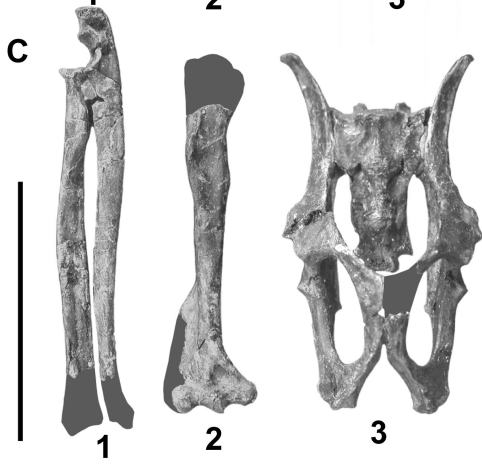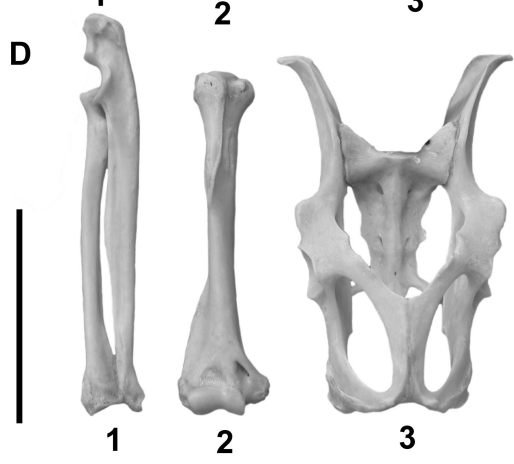

Supplement: pnas_0610579104_22.pdf [file pnas_0610579104_22.pdf]

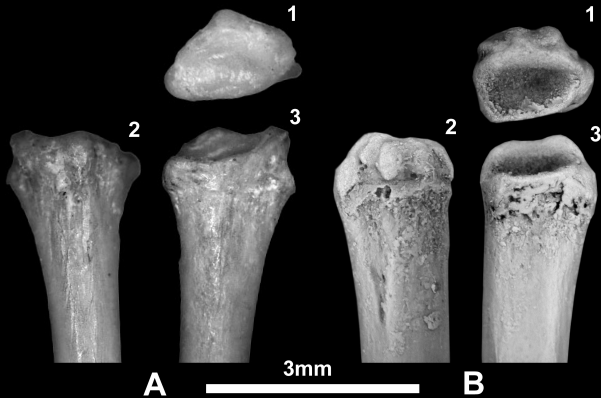

Supplement: pnas_0610579104_23.pdf [file pnas_0610579104_23.pdf]

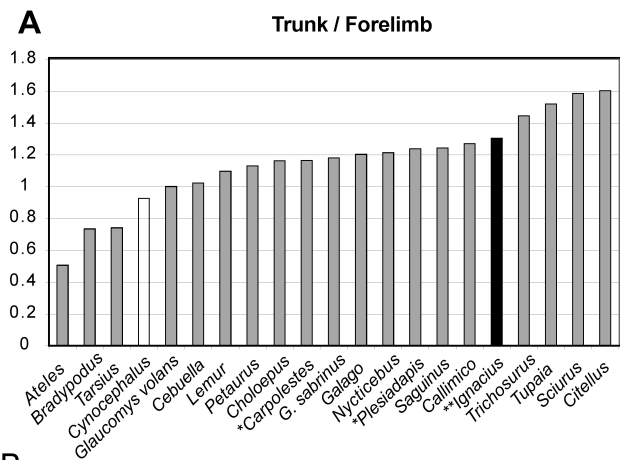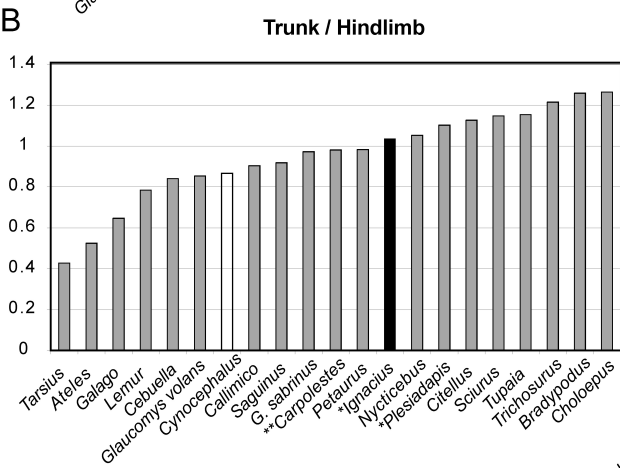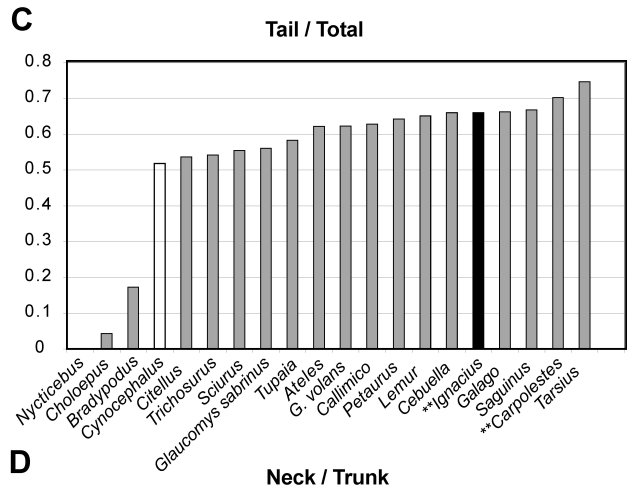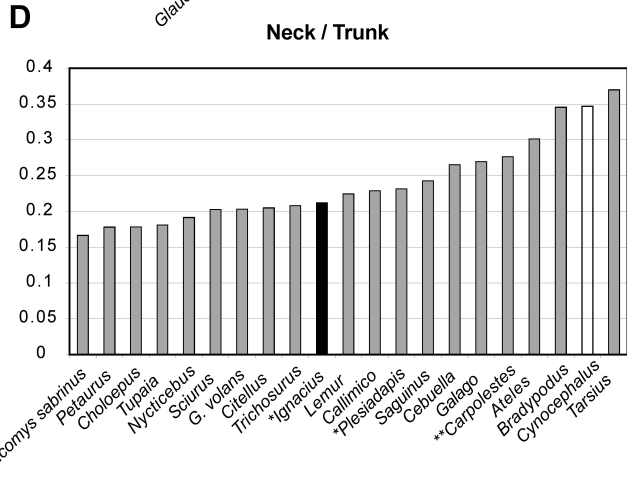

Supplement: pnas_0610579104_24.pdf [file pnas_0610579104_24.pdf]

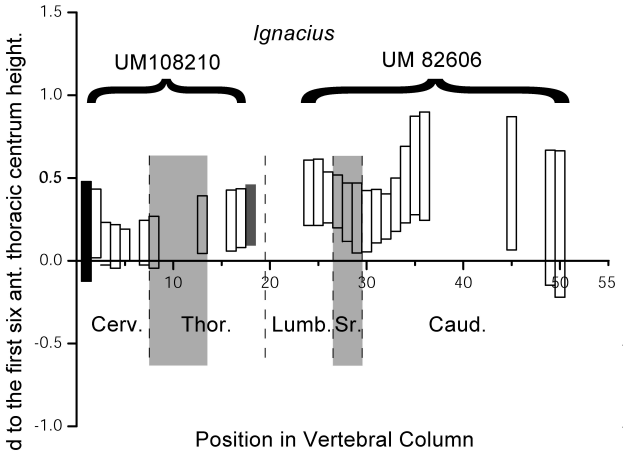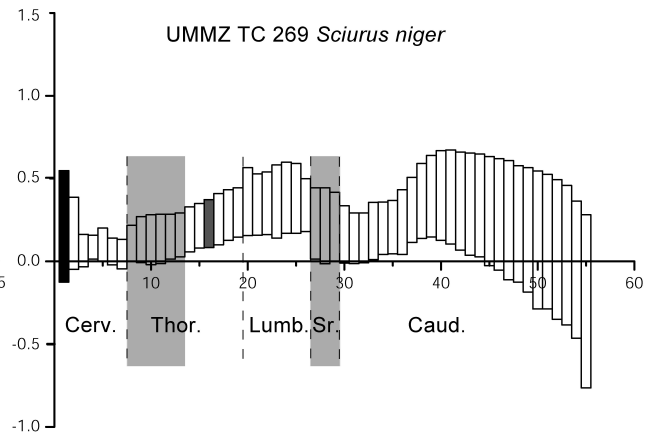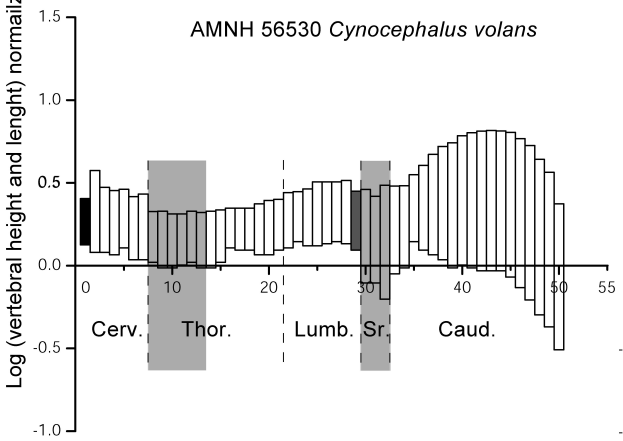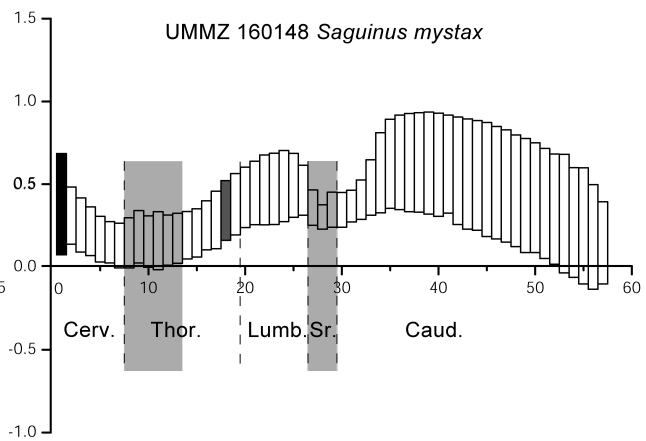

Supplement: pnas_0610579104_25.pdf [file pnas_0610579104_25.pdf]

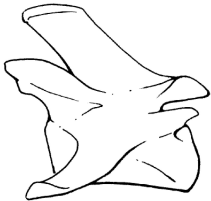

*Saguinus*

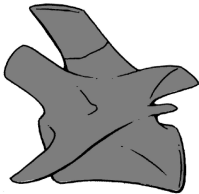

*Ignaciuss*

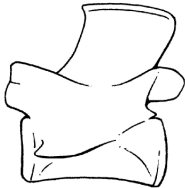

*Cynocephalus*

Supplement: pnas_0610579104_26.pdf [file pnas_0610579104_26.pdf]

Ap lumbar

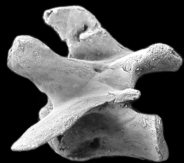

sacrum

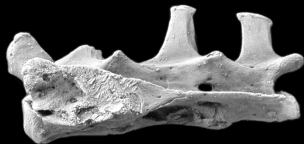

caudal II

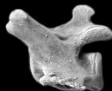

caudal VI

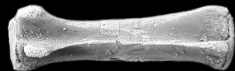

Lateral

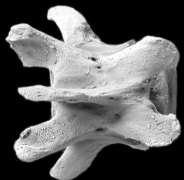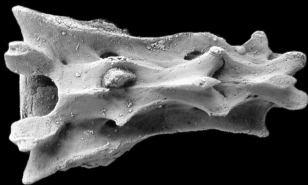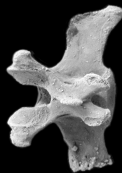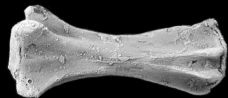

Dorsal

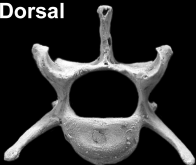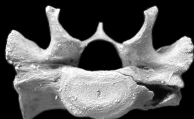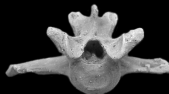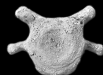

Cranial

5mm

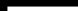

Supplement: pnas_0610579104_27.pdf [file pnas_0610579104_27.pdf]

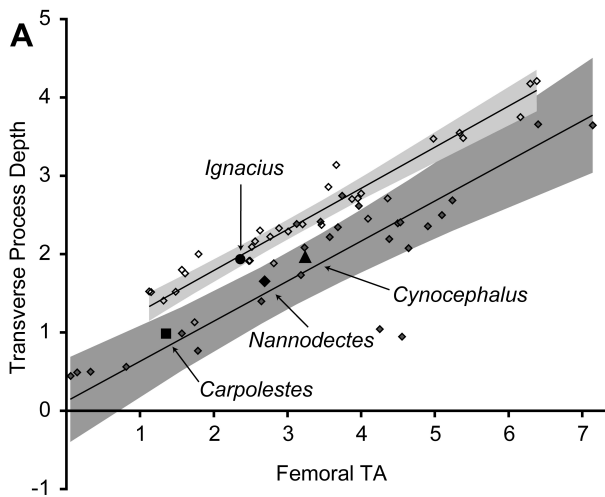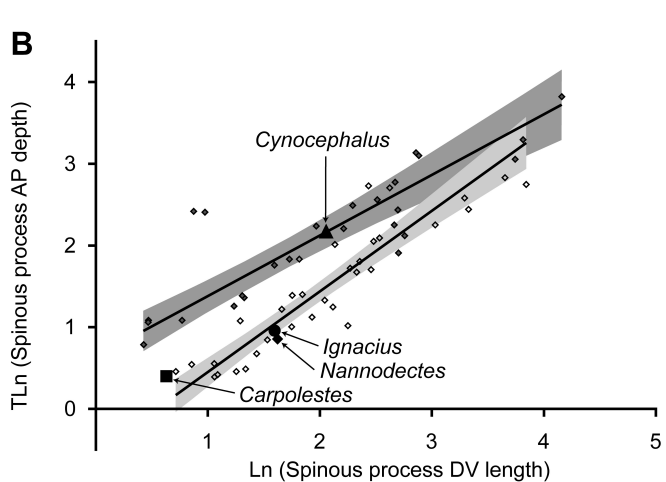

Supplement: pnas_0610579104_28.pdf [file pnas_0610579104_28.pdf]

**A**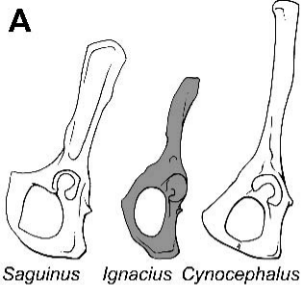**B**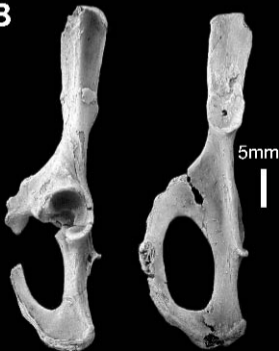

Supplement: pnas_0610579104_29.pdf [file pnas_0610579104_29.pdf]

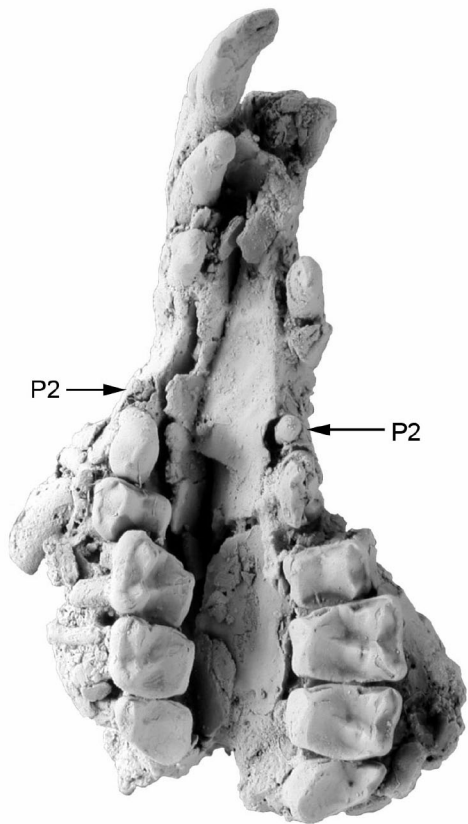

Supplement: pnas_0610579104_3.pdf [file pnas_0610579104_3.pdf]

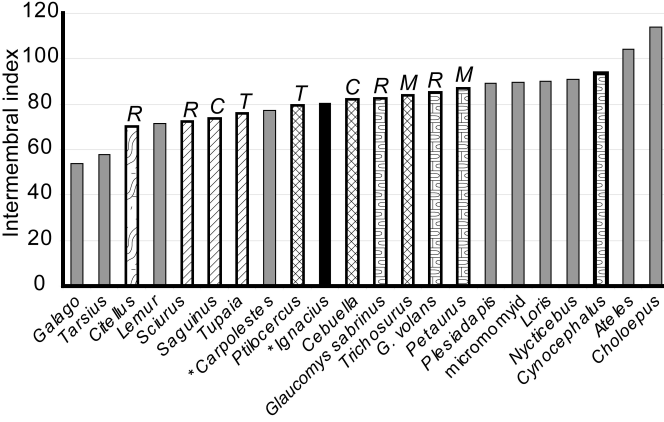

Supplement: pnas_0610579104_30.pdf [file pnas_0610579104_30.pdf]

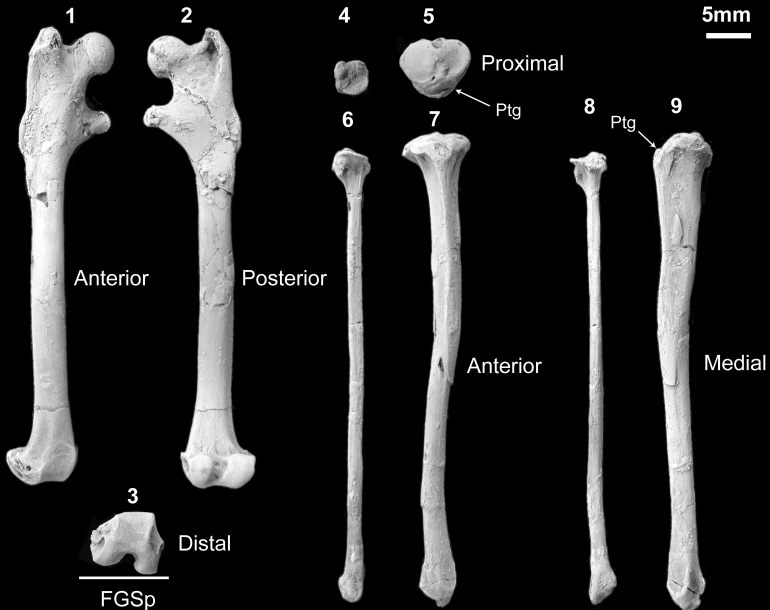

Supplement: pnas_0610579104_31.pdf [file pnas_0610579104_31.pdf]

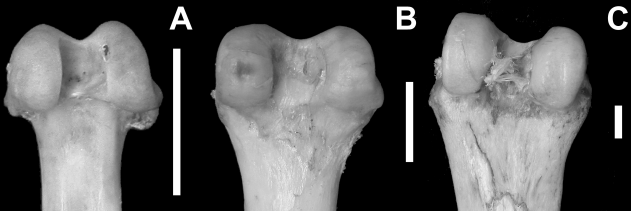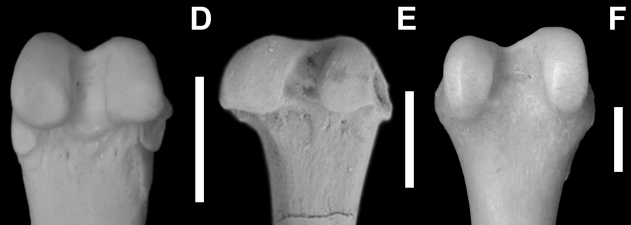

Supplement: pnas_0610579104_32.pdf [file pnas_0610579104_32.pdf]

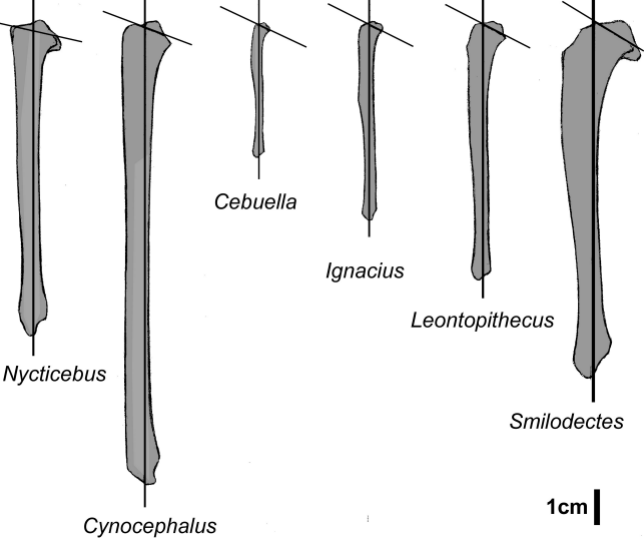

Supplement: pnas_0610579104_33.pdf [file pnas_0610579104_33.pdf]

*Saguinus*

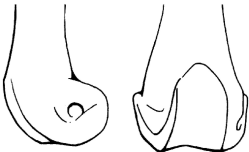

*Ignacius*

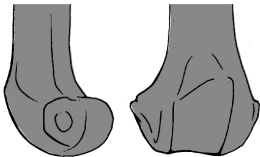

*Cynocephalus*

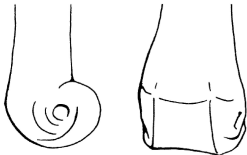

Medial

Anterior

Supplement: pnas_0610579104_34.pdf [file pnas_0610579104_34.pdf]

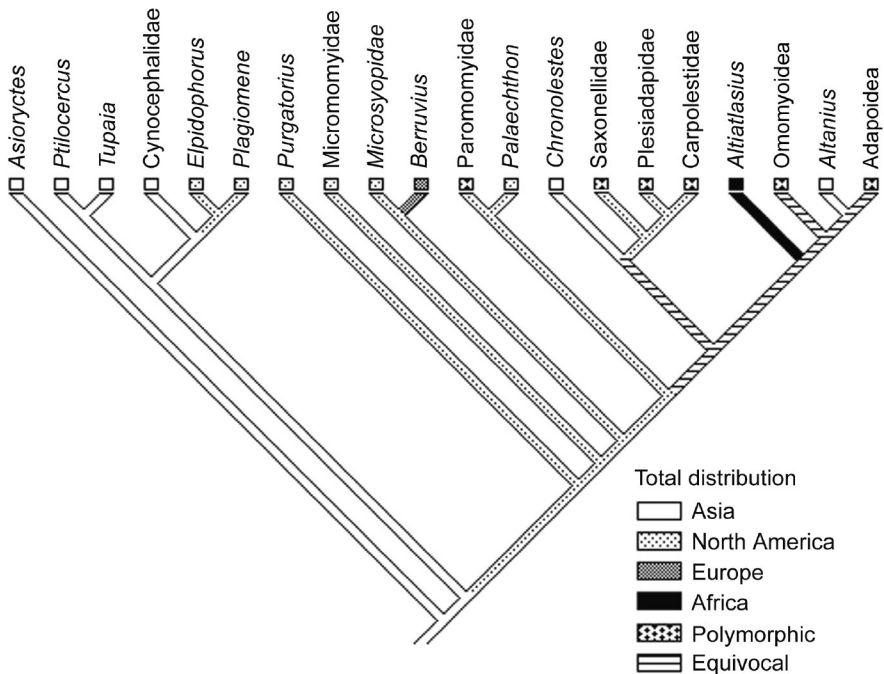

Supplement: pnas_0610579104_36.pdf [file pnas_0610579104_36.pdf]

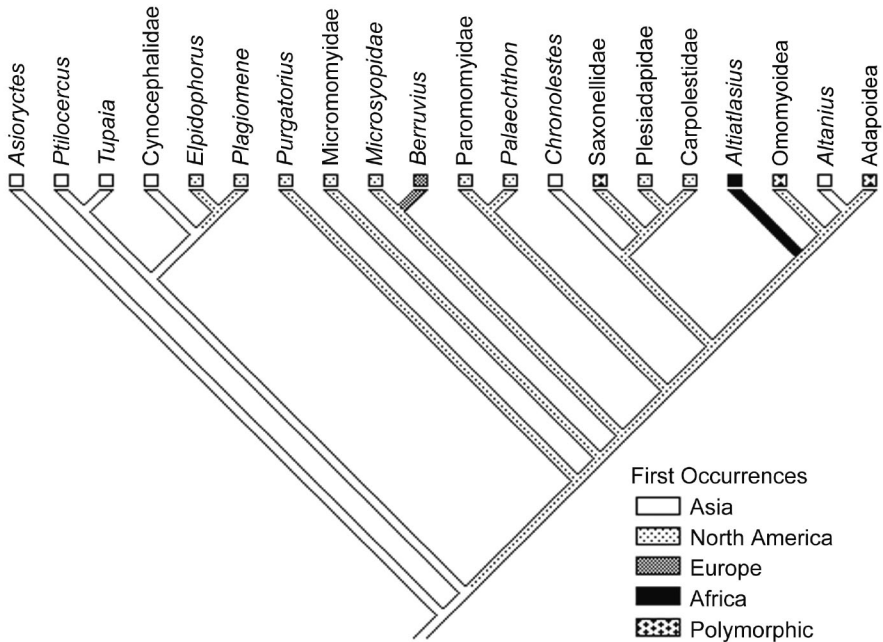

Supplement: pnas_0610579104_37.pdf [file pnas_0610579104_37.pdf]

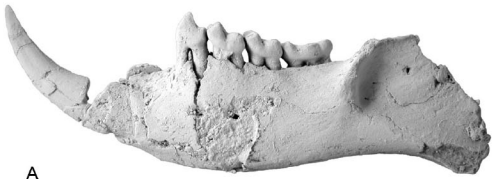

A

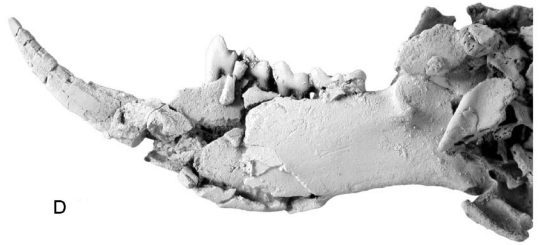

D

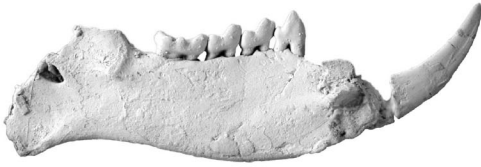

B

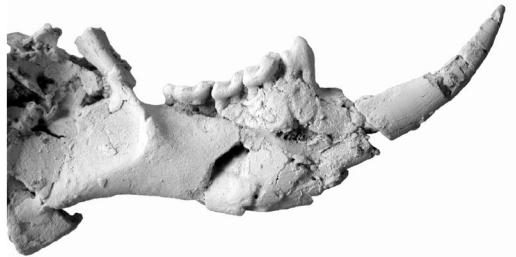

E

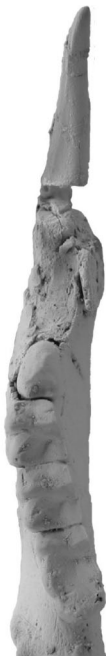

C

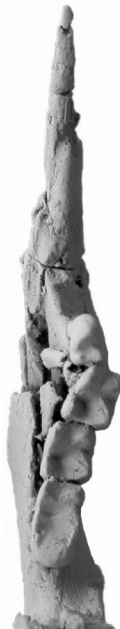

F

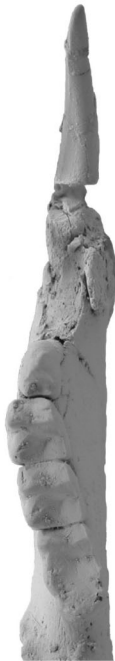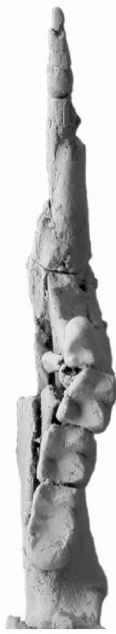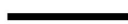

Supplement: pnas_0610579104_4.pdf [file pnas_0610579104_4.pdf]

**A**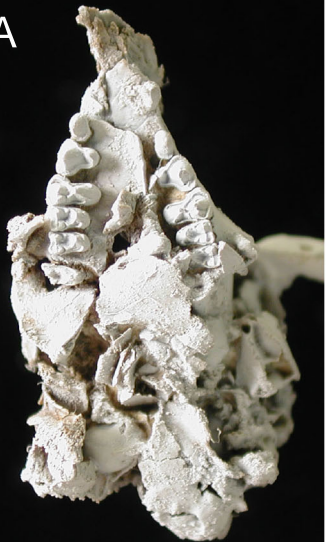**B**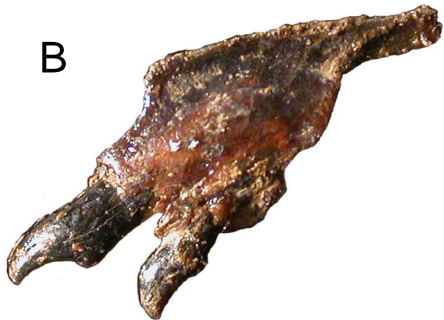**C**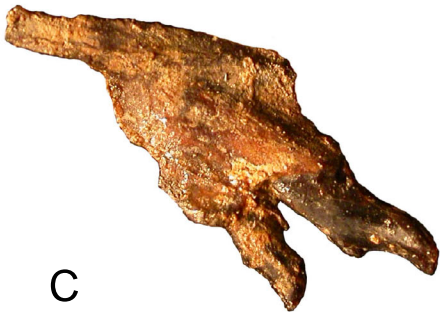

Supplement: pnas_0610579104_5.pdf [file pnas_0610579104_5.pdf]

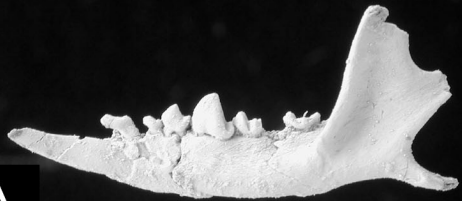

**A**

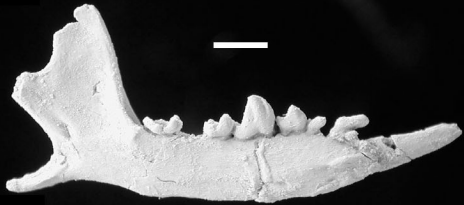

**B**

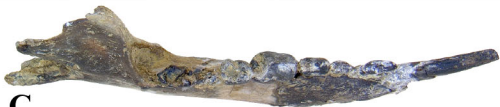

**C**

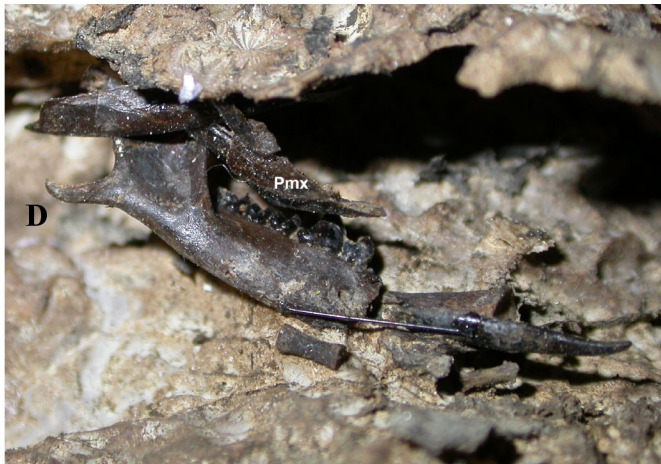

**D**

Pmx

Supplement: pnas_0610579104_6.pdf [file pnas_0610579104_6.pdf]

**A**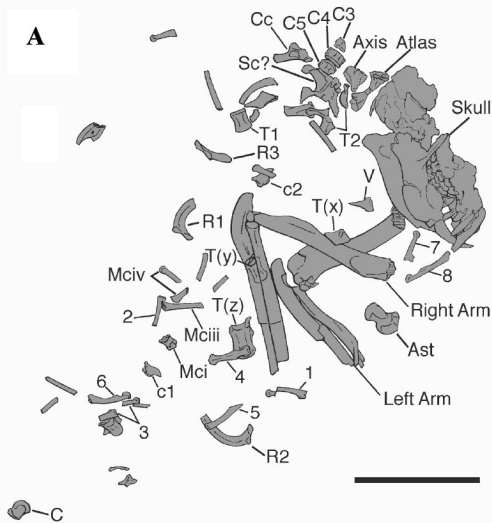**B**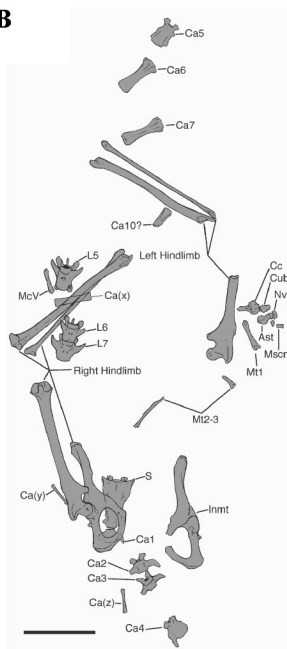**C**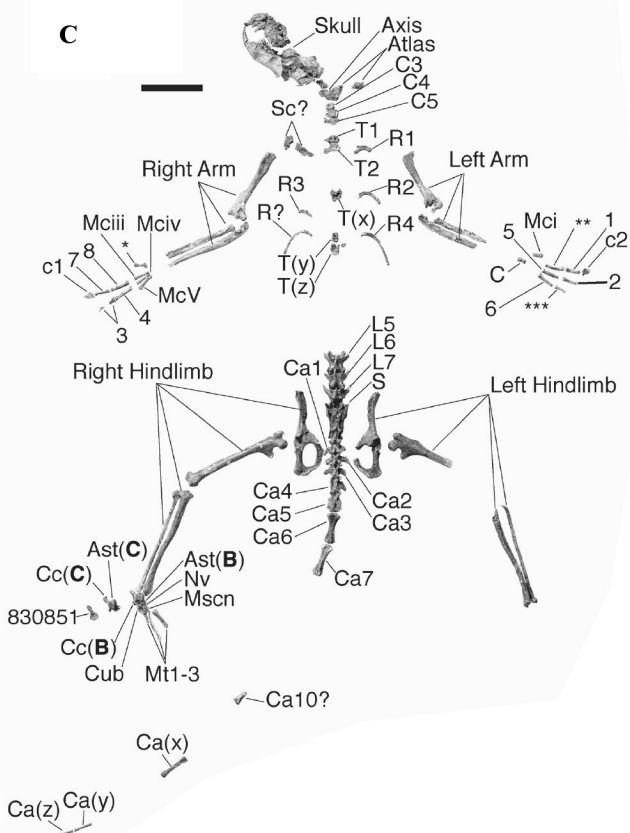

Supplement: pnas_0610579104_8.pdf [file pnas_0610579104_8.pdf]

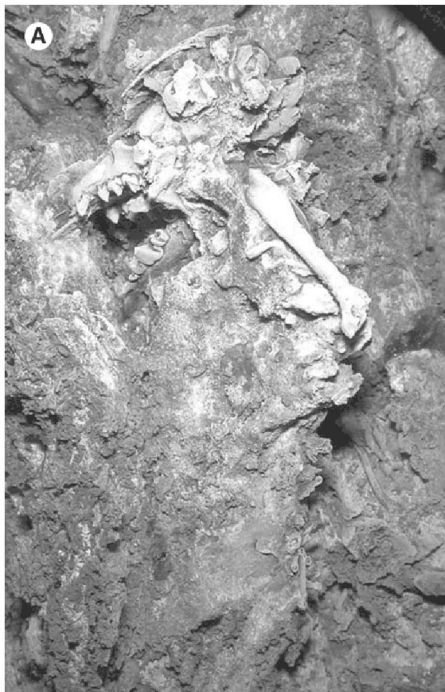

**B**

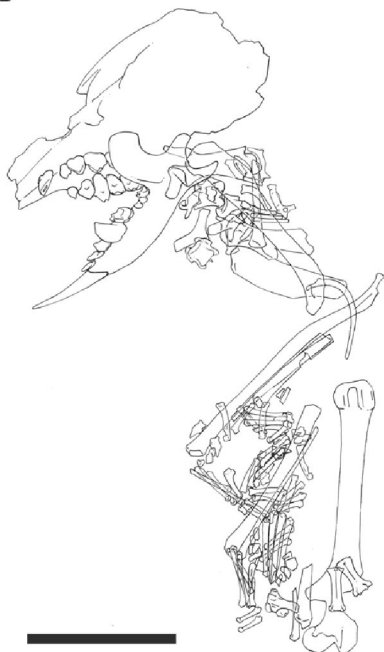

Supplement: pnas_0610579104_9.pdf [file pnas_0610579104_9.pdf]
